# Supplementary material for: Quantitative Fit Testing on Filtering Facepiece Respirators in Use by Peruvian Healthcare Workers Caring for Tuberculosis Patients During the COVID-19 Pandemic: PROFIT Study 2020
Source: Preprints.org preprint supplement (doi:10.20944/preprints202306.1055.v1), 2023-06-14
Supplement: Supplementary file 1 [file supplementary]

**Table S1.** Characteristics of 263 workers enrolled in the PROFIT study 2020.

|                                             | n (%)        |
|---------------------------------------------|--------------|
| <b>Sex</b>                                  |              |
| Female                                      | 219 (83.3)   |
| Male                                        | 44 (16.7)    |
| <b>Age (median and interquartile range)</b> | 40 (RIC: 18) |
| <b>Labor</b>                                |              |
| Nursing Assistant                           | 72 (27.5)    |
| Nurse                                       | 51 (19.5)    |
| Doctor                                      | 36 (13.7)    |
| Laboratory technician                       | 23 (8.8)     |
| Psychologist                                | 15 (5.7)     |
| Dentist                                     | 11 (4.2)     |
| Nutritionist                                | 9 (3.4)      |
| Medical Technologist                        | 9 (3.4)      |
| Other's healthcare workers                  | 23 (8.8)     |
| Not reported                                | 14 (5.4)     |
| <b>Working areas</b>                        |              |
| TB Control Program                          | 89 (33.8)    |
| Outpatient clinics and dental office        | 66 (25.1)    |
| Triage and topic                            | 27 (10.3)    |
| Mycobacteriology laboratory                 | 21 (8.0)     |
| Radiology                                   | 6 (2.3)      |
| Other's healthcare areas                    | 32 (12.2)    |
| Not reported                                | 22 (8.4)     |
