# Supplementary material for: Quantitative Fit Testing on Filtering Facepiece Respirators in Use by Peruvian Healthcare Workers Caring for Tuberculosis Patients During the COVID-19 Pandemic: PROFIT Study 2020
Source: Preprints.org preprint supplement (doi:10.20944/preprints202306.1055.v1), 2023-06-14
Supplement: Supplementary file 2 [file supplementary]

**Table S3. Real-time and overall fit factor obtained in FFR excluded of analysis (N = 16)**

| N  | ID   | Brand, model, and type of FF               | Exclusion criteria                      | FFR usage time (hours) | rt-FF pre-instruction | rt-FF post-instruction | overall-FF |
|----|------|--------------------------------------------|-----------------------------------------|------------------------|-----------------------|------------------------|------------|
| 1  | 4118 | 3M, model 1860, type N95                   | verifiable FFR timeout <sup>a</sup>     | 16                     | 7                     | 6                      | 5          |
| 2  | 6131 | 3M, model 1860, type N95                   | verifiable FFR timeout <sup>a</sup>     | 1                      | 10                    | 22                     | 11         |
| 3  | 2230 | 3M, model 1860, type N95                   | high suspected counterfeit <sup>b</sup> | -                      | -                     | -                      | 4          |
| 4  | 1102 | 3M, model 1860, type N95                   | high suspected counterfeit <sup>c</sup> | 8                      | 2                     | 4                      | 6          |
| 5  | 7131 | 3M, model 1860, type N95                   | high suspected counterfeit <sup>c</sup> | 1                      | 26                    | 27                     | 12         |
| 6  | 6216 | Xiantao Zhong Yi, model ZYB - 11, type N95 | facial hair                             | 6                      | 1                     | 36                     | 6          |
| 7  | 8226 | Xiantao Zhong Yi, model ZYB - 11, type N95 | facial hair                             | 5                      | 1                     | 4                      | 3          |
| 8  | 4218 | 3M, model 1860, type N95                   | facial hair                             | 1                      | -                     | -                      | 25         |
| 9  | 5232 | 3M, model 1860, type N95                   | facial hair                             | 6                      | 12                    | 107                    | 70         |
| 10 | 5121 | 3M, model 9010, type N95                   | facial hair                             | 36                     | 4                     | 10                     | 8          |
| 11 | 1121 | Makrite, model 9500, type N95              | facial hair                             | 8                      | 3                     | 9                      | 6          |
| 12 | 6125 | Makrite, model 9500, type N95              | facial hair                             | 18                     | 4                     | 11                     | 7          |
| 13 | 6135 | Makrite, model 9500, type N95              | facial hair                             | 48                     | 2                     | 2                      | 17         |
| 14 | 2128 | GIKO, model 1200H, type N95                | facial hair                             | 3                      | 20                    | 20                     | 15         |
| 15 | 4129 | Grande, model CDN3S-P2, type FFP2          | facial hair                             | 12                     | 2                     | 2                      | 3          |
| 16 | 6226 | Xiantao Zhong Yi, model ZYB - 11, type N95 | facial hair                             | 4                      | 2                     | 9                      | 3          |

<sup>a</sup> Small size

<sup>b</sup> Acquired on own account

<sup>c</sup> Provided by PHC
