# Supplementary material for: Quantitative Fit Testing on Filtering Facepiece Respirators in Use by Peruvian Healthcare Workers Caring for Tuberculosis Patients During the COVID-19 Pandemic: PROFIT Study 2020
Source: Preprints.org preprint supplement (doi:10.20944/preprints202306.1055.v1), 2023-06-14
Supplement: Supplementary file 3 [file supplementary]

**Table S2. Real-time and overall fit factor obtained in FFR of 263 workers enrolled in the PROFIT study 2020.**

| N  | ID   | Brand, model, and type of FF               | rt-FF pre-instruction | rt-FF post-instruction | overall-FF |
|----|------|--------------------------------------------|-----------------------|------------------------|------------|
| 1  | 1103 | 3M, model 1860, type N95                   | 42                    | 200                    | 200        |
| 2  | 1107 | Grande, model CDN3S-P2, type FFP2          | 38                    | 200                    | 168        |
| 3  | 1108 | Makrite, model 9500, type N95              | 2                     | 18                     | 10         |
| 4  | 1110 | Grande, model CDN3S-P2, type FFP2          | 3                     | 11                     | 20         |
| 5  | 1112 | Makrite, model 9500, type N95              | 1                     | 9                      | 5          |
| 6  | 1114 | 3M, model 1860, type N95                   | Not done              | Not done               | 173        |
| 7  | 1117 | 3M, model 1860, type N95                   | Not done              | Not done               | 157        |
| 8  | 1118 | 3M, model 1860, type N95                   | 19                    | 200                    | 172        |
| 9  | 1119 | 3M, model 1860, type N95                   | Not done              | Not done               | 11         |
| 10 | 1120 | 3M, model 1860, type N95                   | 38                    | 76                     | 10         |
| 11 | 1122 | Xiantao Zhong Yi, model ZYB - 11, type N95 | 15                    | 38                     | 22         |
| 12 | 1123 | Xiantao Zhong Yi, model ZYB - 11, type N95 | Not done              | Not done               | 9          |
| 13 | 1125 | PGT Care, model PGT-0095, type FFP2        | 13                    | 150                    | 31         |
| 14 | 1127 | 3M, model 9010, type N95                   | 42                    | 72                     | 13         |
| 15 | 1128 | Xiantao Zhong Yi, model ZYB - 11, type N95 | 15                    | 40                     | 18         |
| 16 | 1129 | 3M, model 9010, type N95                   | 52                    | 200                    | 123        |
| 17 | 1131 | 3M, model 1860, type N95                   | 140                   | 200                    | 152        |
| 18 | 1134 | Xiantao Zhong Yi, model ZYB - 11, type N95 | 15                    | 45                     | 38         |
| 19 | 1135 | Makrite, model 9500, type N95              | 45                    | 200                    | 88         |
| 20 | 1201 | 3M, model 9920H, type PFF                  | 3                     | 10                     | 6          |
| 21 | 1204 | Makrite, model 9500, type N95              | 7                     | 15                     | 5          |
| 22 | 1205 | 3M, model 1860, type N95                   | 13                    | 200                    | 109        |
| 23 | 1206 | Xiantao Zhong Yi, model ZYB - 11, type N95 | 2                     | 21                     | 2          |
| 24 | 1207 | 3M, model 9920H, type PFF                  | 5                     | 11                     | 10         |
| 25 | 1208 | 3M, model 9010, type N95                   | 1                     | 5                      | 3          |
| 26 | 1209 | Makrite, model 9500, type N95              | 5                     | 44                     | 6          |
| 27 | 1211 | Makrite, model 9500, type N95              | 2                     | 80                     | 50         |
| 28 | 1212 | Makrite, model 9500, type N95              | 2                     | 5                      | 4          |
| 29 | 1213 | 3M, model 1860, type N95                   | 115                   | 200                    | 200        |
| 30 | 1215 | 3M, model 1860, type N95                   | Not done              | Not done               | 200        |
| 31 | 1216 | Xiantao Zhong Yi, model ZYB - 11, type N95 | 14                    | 88                     | 16         |
| 32 | 1218 | 3M, model 1860, type N95                   | Not done              | Not done               | 13         |
| 33 | 1223 | Makrite, model 9500, type N95              | Not done              | Not done               | 32         |
| 34 | 1224 | 3M, model 1860, type N95                   | Not done              | Not done               | 131        |

|    |      |                                            |          |          |     |
|----|------|--------------------------------------------|----------|----------|-----|
| 35 | 1226 | 3M, model 1860, type N95                   | 5        | 200      | 200 |
| 36 | 1230 | Xiantao Zhong Yi, model ZYB - 11, type N95 | Not done | Not done | 27  |
| 37 | 1232 | 3M, model 1860, type N95                   | 50       | 75       | 51  |
| 38 | 1233 | Brand and model unknown, type KN95         | Not done | Not done | 6   |
| 39 | 1234 | Xiantao Zhong Yi, model ZYB - 11, type N95 | 2        | 25       | 17  |
| 40 | 1236 | Xiantao Zhong Yi, model ZYB - 11, type N95 | 14       | 33       | 21  |
| 41 | 2102 | 3M, model 1860, type N95                   | 8        | 200      | 200 |
| 42 | 2103 | 3M, model 1860, type N95                   | 200      | 200      | 200 |
| 43 | 2107 | 3M, model 9010, type N95                   | 1        | 181      | 122 |
| 44 | 2108 | 3M, model 9010, type N95                   | 1        | 200      | 108 |
| 45 | 2110 | Makrite, model 9500, type N95              | 6        | 25       | 14  |
| 46 | 2112 | PGT Care, model PGT-0095, type FFP2        | 4        | 20       | 6   |
| 47 | 2114 | 3M, model 1860, type N95                   | Not done | Not done | 160 |
| 48 | 2117 | Xiantao Zhong Yi, model ZYB - 11, type N95 | Not done | Not done | 17  |
| 49 | 2118 | 3M, model 1860, type N95                   | 200      | 200      | 176 |
| 50 | 2119 | 3M, model 1860, type N95                   | Not done | Not done | 154 |
| 51 | 2120 | 3M, model 1860, type N95                   | 8        | 154      | 111 |
| 52 | 2121 | Makrite, model 9500, type N95              | 22       | 50       | 46  |
| 53 | 2122 | Xiantao Zhong Yi, model ZYB - 11, type N95 | 4        | 32       | 18  |
| 54 | 2123 | Xiantao Zhong Yi, model ZYB - 11, type N95 | Not done | Not done | 38  |
| 55 | 2125 | PGT Care, model PGT-0095, type FFP2        | 14       | 200      | 65  |
| 56 | 2127 | Xiantao Zhong Yi, model ZYB - 11, type N95 | 52       | 70       | 51  |
| 57 | 2129 | Makrite, model 9500, type N95              | 2        | 50       | 13  |
| 58 | 2131 | 3M, model 1860, type N95                   | 200      | 200      | 200 |
| 59 | 2134 | Xiantao Zhong Yi, model ZYB - 11, type N95 | 12       | 40       | 30  |
| 60 | 2135 | Makrite, model 9500, type N95              | 13       | 35       | 27  |
| 61 | 2201 | 3M, model 9920H, type PFF                  | 14       | 200      | 198 |
| 62 | 2204 | Makrite, model 9500, type N95              | 5        | 70       | 28  |
| 63 | 2205 | 3M, model 1860, type N95                   | 200      | 200      | 198 |
| 64 | 2207 | Makrite, model 9500, type N95              | 1        | 50       | 3   |
| 65 | 2208 | Brand and model unknown, type KN95         | 2        | 30       | 1   |
| 66 | 2209 | Makrite, model 9500, type N95              | 2        | 105      | 43  |
| 67 | 2211 | 3M, model 1860, type N95                   | 16       | 130      | 121 |
| 68 | 2212 | Makrite, model 9500, type N95              | 2        | 5        | 8   |
| 69 | 2213 | 3M, model 1860, type N95                   | 47       | 200      | 169 |
| 70 | 2215 | 3M, model 1860, type N95                   | Not done | Not done | 200 |

|     |      |                                            |          |          |     |
|-----|------|--------------------------------------------|----------|----------|-----|
| 71  | 2216 | Xiantao Zhong Yi, model ZYB - 11, type N95 | 36       | 47       | 20  |
| 72  | 2218 | 3M, model 1860, type N95                   | Not done | Not done | 169 |
| 73  | 2223 | 3M, model 9010, type N95                   | Not done | Not done | 152 |
| 74  | 2224 | 3M, model 1860, type N95                   | Not done | Not done | 127 |
| 75  | 2226 | 3M, model 9010, type N95                   | 6        | 70       | 63  |
| 76  | 2232 | 3M, model 1860, type N95                   | 8        | 4        | 25  |
| 77  | 2233 | 3M, model 1860, type N95                   | Not done | Not done | 200 |
| 78  | 2234 | Xiantao Zhong Yi, model ZYB - 11, type N95 | 2        | 4        | 2   |
| 79  | 2236 | Brand and model unknown, type KN95         | 2        | 3        | 2   |
| 80  | 3102 | Makrite, model 9500, type N95              | 2        | 40       | 80  |
| 81  | 3103 | 3M, model 1860, type N95                   | 23       | 120      | 178 |
| 82  | 3107 | 3M, model 1860, type N95                   | 93       | 200      | 148 |
| 83  | 3108 | Brand and model unknown, type KN95         | 2        | 12       | 8   |
| 84  | 3110 | 3M, model 9010, type N95                   | 90       | 200      | 181 |
| 85  | 3114 | 3M, model 1860, type N95                   | Not done | Not done | 200 |
| 86  | 3117 | Xiantao Zhong Yi, model ZYB - 11, type N95 | Not done | Not done | 12  |
| 87  | 3118 | 3M, model 1860, type N95                   | 200      | 200      | 123 |
| 88  | 3119 | 3M, model 1860, type N95                   | Not done | Not done | 71  |
| 89  | 3120 | 3M, model 1860, type N95                   | 190      | 200      | 186 |
| 90  | 3121 | 3M, model 9010, type N95                   | 60       | 200      | 79  |
| 91  | 3122 | Xiantao Zhong Yi, model ZYB - 11, type N95 | 4        | 30       | 33  |
| 92  | 3123 | Makrite, model 9500, type N95              | Not done | Not done | 26  |
| 93  | 3125 | Makrite, model 9500, type N95              | 4        | 20       | 11  |
| 94  | 3127 | 3M, model 9010, type N95                   | 7        | 38       | 34  |
| 95  | 3128 | Makrite, model 9500, type N95              | 2        | 25       | 8   |
| 96  | 3129 | Grande, model CDN3S-P2, type FFP2          | 4        | 110      | 42  |
| 97  | 3131 | 3M, model 1860, type N95                   | 200      | 200      | 192 |
| 98  | 3135 | Makrite, model 9500, type N95              | 31       | 70       | 24  |
| 99  | 3201 | 3M, model 9920H, type PFF                  | 30       | 200      | 196 |
| 100 | 3204 | Grande, model CDN3S-P2, type FFP2          | 12       | 50       | 19  |
| 101 | 3205 | 3M, model 1860, type N95                   | 18       | 200      | 198 |
| 102 | 3206 | Grande, model CDN3S-P2, type FFP2          | 11       | 60       | 5   |
| 103 | 3207 | Brand and model unknown, type KN95         | 1        | 20       | 1   |
| 104 | 3209 | Makrite, model 9500, type N95              | 3        | 40       | 11  |
| 105 | 3211 | Makrite, model 9500, type N95              | 2        | 70       | 51  |
| 106 | 3212 | Makrite, model 9500, type N95              | 1        | 8        | 7   |
| 107 | 3213 | Xiantao Zhong Yi, model ZYB - 11, type N95 | 2        | 5        | 2   |

|     |      |                                            |          |          |     |
|-----|------|--------------------------------------------|----------|----------|-----|
| 108 | 3215 | 3M, model 1860, type N95                   | Not done | Not done | 120 |
| 109 | 3216 | 3M, model 1860, type N95                   | 80       | 200      | 150 |
| 110 | 3218 | 3M, model 1860, type N95                   | Not done | Not done | 152 |
| 111 | 3223 | Makrite, model 9500, type N95              | Not done | Not done | 58  |
| 112 | 3224 | 3M, model 1860, type N95                   | Not done | Not done | 198 |
| 113 | 3226 | 3M, model 1860, type N95                   | 150      | 200      | 97  |
| 114 | 3230 | Xiantao Zhong Yi, model ZYB - 11, type N95 | Not done | Not done | 3   |
| 115 | 3232 | Xiantao Zhong Yi, model ZYB - 11, type N95 | 30       | 50       | 46  |
| 116 | 3233 | 3M, model 1860, type N95                   | Not done | Not done | 174 |
| 117 | 3236 | 3M, model 1860, type N95                   | 66       | 200      | 200 |
| 118 | 4102 | Makrite, model 9500, type N95              | 1        | 20       | 14  |
| 119 | 4103 | 3M, model 1860, type N95                   | 92       | 178      | 120 |
| 120 | 4107 | Makrite, model 9500, type N95              | 20       | 30       | 35  |
| 121 | 4110 | Makrite, model 9500, type N95              | 30       | 50       | 32  |
| 122 | 4114 | 3M, model 1860, type N95                   | Not done | Not done | 23  |
| 123 | 4117 | Xiantao Zhong Yi, model ZYB - 11, type N95 | Not done | Not done | 59  |
| 124 | 4119 | 3M, model 1860, type N95                   | Not done | Not done | 71  |
| 125 | 4120 | 3M, model 1860, type N95                   | 83       | 200      | 200 |
| 126 | 4121 | Grande, model CDN3S-P2, type FFP2          | 9        | 45       | 4   |
| 127 | 4122 | Xiantao Zhong Yi, model ZYB - 11, type N95 | 20       | 58       | 82  |
| 128 | 4123 | Xiantao Zhong Yi, model ZYB - 11, type N95 | Not done | Not done | 24  |
| 129 | 4125 | PGT Care, model PGT-0095, type FFP2        | 26       | 200      | 176 |
| 130 | 4127 | Xiantao Zhong Yi, model ZYB - 11, type N95 | 5        | 28       | 32  |
| 131 | 4128 | Makrite, model 9500, type N95              | 80       | 120      | 71  |
| 132 | 4131 | 3M, model 1860, type N95                   | 65       | 200      | 121 |
| 133 | 4135 | Makrite, model 9500, type N95              | 2        | 16       | 6   |
| 134 | 4201 | Makrite, model 9500, type N95              | 2        | 7        | 3   |
| 135 | 4205 | 3M, model 1860, type N95                   | 100      | 200      | 180 |
| 136 | 4206 | Makrite, model 9500, type N95              | 2        | 21       | 2   |
| 137 | 4209 | Grande, model CDN3S-P2, type FFP2          | 106      | 200      | 156 |
| 138 | 4211 | 3M, model 9010, type N95                   | 2        | 100      | 16  |
| 139 | 4212 | Makrite, model 9500, type N95              | 1        | 7        | 2   |
| 140 | 4213 | 3M, model 1860, type N95                   | 200      | 200      | 172 |
| 141 | 4215 | 3M, model 1860, type N95                   | Not done | Not done | 163 |
| 142 | 4216 | 3M, model 1860, type N95                   | 100      | 200      | 200 |
| 143 | 4223 | Benehal, model MS6115L, type N95           | Not done | Not done | 80  |
| 144 | 4224 | 3M, model 1860, type N95                   | Not done | Not done | 163 |
| 145 | 4226 | PGT Care, model PGT-0095, type FFP2        | 10       | 15       | 5   |

|     |      |                                            |          |          |     |
|-----|------|--------------------------------------------|----------|----------|-----|
| 146 | 4230 | Xiantao Zhong Yi, model ZYB - 11, type N95 | Not done | Not done | 41  |
| 147 | 4232 | Xiantao Zhong Yi, model ZYB - 11, type N95 | 13       | 30       | 17  |
| 148 | 4233 | 3M, model 1860, type N95                   | Not done | Not done | 27  |
| 149 | 4236 | 3M, model 9920H, type PFF                  | 100      | 110      | 92  |
| 150 | 5102 | Xiantao Zhong Yi, model ZYB - 11, type N95 | 2        | 4        | 3   |
| 151 | 5103 | 3M, model 1860, type N95                   | 4        | 200      | 200 |
| 152 | 5114 | 3M, model 1860, type N95                   | Not done | Not done | 148 |
| 153 | 5117 | Xiantao Zhong Yi, model ZYB - 11, type N95 | Not done | Not done | 29  |
| 154 | 5118 | Brand and model unknown, type KN95         | 15       | 22       | 5   |
| 155 | 5119 | 3M, model 1860, type N95                   | Not done | Not done | 28  |
| 156 | 5120 | 3M, model 1860, type N95                   | 200      | 200      | 139 |
| 157 | 5122 | Xiantao Zhong Yi, model ZYB - 11, type N95 | 4        | 87       | 59  |
| 158 | 5123 | Makrite, model 9500, type N95              | Not done | Not done | 9   |
| 159 | 5125 | Makrite, model 9500, type N95              | 20       | 32       | 18  |
| 160 | 5127 | 3M, model 9010, type N95                   | 15       | 200      | 156 |
| 161 | 5128 | Xiantao Zhong Yi, model ZYB - 11, type N95 | 18       | 35       | 14  |
| 162 | 5131 | 3M, model 1860, type N95                   | 60       | 200      | 198 |
| 163 | 5135 | Makrite, model 9500, type N95              | 2        | 125      | 73  |
| 164 | 5201 | Xiantao Zhong Yi, model ZYB - 11, type N95 | 15       | 60       | 34  |
| 165 | 5205 | 3M, model 1860, type N95                   | 101      | 200      | 143 |
| 166 | 5209 | Makrite, model 9500, type N95              | 11       | 55       | 34  |
| 167 | 5211 | 3M, model 9010, type N95                   | 10       | 40       | 16  |
| 168 | 5215 | 3M, model 1860, type N95                   | Not done | Not done | 173 |
| 169 | 5216 | 3M, model 1860, type N95                   | 50       | 150      | 200 |
| 170 | 5218 | Xiantao Zhong Yi, model ZYB - 11, type N95 | Not done | Not done | 16  |
| 171 | 5223 | Xiantao Zhong Yi, model ZYB - 11, type N95 | Not done | Not done | 18  |
| 172 | 5224 | 3M, model 1860, type N95                   | Not done | Not done | 165 |
| 173 | 5226 | PGT Care, model PGT-0095, type FFP2        | 1        | 13       | 8   |
| 174 | 5230 | Xiantao Zhong Yi, model ZYB - 11, type N95 | Not done | Not done | 16  |
| 175 | 5233 | 3M, model 1860, type N95                   | Not done | Not done | 195 |
| 176 | 5236 | 3M, model 9920H, type PFF                  | 9        | 21       | 2   |
| 177 | 6102 | Makrite, model 9500, type N95              | 2        | 20       | 5   |
| 178 | 6103 | 3M, model 1860, type N95                   | Not done | Not done | 49  |
| 179 | 6117 | Xiantao Zhong Yi, model ZYB - 11, type N95 | Not done | Not done | 13  |
| 180 | 6118 | 3M, model 9010, type N95                   | 3        | 95       | 52  |

|     |      |                                            |          |          |     |
|-----|------|--------------------------------------------|----------|----------|-----|
| 181 | 6119 | 3M, model 1860, type N95                   | Not done | Not done | 153 |
| 182 | 6120 | Xiantao Zhong Yi, model ZYB - 11, type N95 | 2        | 2        | 2   |
| 183 | 6121 | Y&Z, model Safety Work F720, type N95      | 1        | 1        | 1   |
| 184 | 6122 | 3M, model 9010, type N95                   | 4        | 200      | 84  |
| 185 | 6123 | Xiantao Zhong Yi, model ZYB - 11, type N95 | Not done | Not done | 24  |
| 186 | 6127 | 3M, model 9010, type N95                   | 1        | 150      | 93  |
| 187 | 6128 | Makrite, model 9500, type N95              | 8        | 40       | 15  |
| 188 | 6129 | Makrite, model 9500, type N95              | 2        | 16       | 4   |
| 189 | 6201 | 3M, model 9920H, type PFF                  | 10       | 100      | 49  |
| 190 | 6205 | 3M, model 1860, type N95                   | 4        | 200      | 113 |
| 191 | 6211 | 3M, model 9010, type N95                   | 2        | 50       | 1   |
| 192 | 6215 | 3M, model 1860, type N95                   | Not done | Not done | 200 |
| 193 | 6218 | Xiantao Zhong Yi, model ZYB - 11, type N95 | Not done | Not done | 4   |
| 194 | 6223 | Xiantao Zhong Yi, model ZYB - 11, type N95 | Not done | Not done | 11  |
| 195 | 6224 | 3M, model 1860, type N95                   | Not done | Not done | 200 |
| 196 | 6230 | Xiantao Zhong Yi, model ZYB - 11, type N95 | Not done | Not done | 17  |
| 197 | 6232 | Xiantao Zhong Yi, model ZYB - 11, type N95 | 30       | 60       | 36  |
| 198 | 6233 | Xiantao Zhong Yi, model ZYB - 11, type N95 | Not done | Not done | 32  |
| 199 | 7102 | Makrite, model 9500, type N95              | 1        | 3        | 1   |
| 200 | 7103 | 3M, model 1860, type N95                   | 70       | 200      | 40  |
| 201 | 7117 | Xiantao Zhong Yi, model ZYB - 11, type N95 | Not done | Not done | 187 |
| 202 | 7118 | 3M, model 9010, type N95                   | 200      | 200      | 146 |
| 203 | 7120 | Xiantao Zhong Yi, model ZYB - 11, type N95 | 20       | 50       | 14  |
| 204 | 7121 | Makrite, model 9500, type N95              | 2        | 15       | 9   |
| 205 | 7122 | Xiantao Zhong Yi, model ZYB - 11, type N95 | 20       | 168      | 77  |
| 206 | 7123 | Makrite, model 9500, type N95              | Not done | Not done | 35  |
| 207 | 7127 | Xiantao Zhong Yi, model ZYB - 11, type N95 | 6        | 40       | 8   |
| 208 | 7128 | Makrite, model 9500, type N95              | 8        | 15       | 25  |
| 209 | 7129 | Lucca Light, Lucca Care, KN95 / FFP2       | 1        | 4        | 4   |
| 210 | 7135 | Makrite, model 9500, type N95              | 7        | 40       | 9   |
| 211 | 7201 | Makrite, model 9500, type N95              | 9        | 25       | 6   |
| 212 | 7205 | 3M, model 1860, type N95                   | 200      | 200      | 128 |
| 213 | 7209 | Grande, model CDN3S-P2, type FFP2          | 3        | 6        | 4   |
| 214 | 7215 | 3M, model 1860, type N95                   | Not done | Not done | 200 |
| 215 | 7216 | Xiantao Zhong Yi, model ZYB - 11, type N95 | 5        | 35       | 15  |

|     |      |                                            |          |          |     |
|-----|------|--------------------------------------------|----------|----------|-----|
| 216 | 7218 | Xiantao Zhong Yi, model ZYB - 11, type N95 | Not done | Not done | 14  |
| 217 | 7223 | Makrite, model 9500, type N95              | Not done | Not done | 4   |
| 218 | 7224 | 3M, model 1860, type N95                   | Not done | Not done | 197 |
| 219 | 7226 | Xiantao Zhong Yi, model ZYB - 11, type N95 | 2        | 25       | 7   |
| 220 | 7230 | Xiantao Zhong Yi, model ZYB - 11, type N95 | Not done | Not done | 8   |
| 221 | 7232 | Xiantao Zhong Yi, model ZYB - 11, type N95 | 50       | 70       | 31  |
| 222 | 7233 | 3M, model 1860, type N95                   | Not done | Not done | 55  |
| 223 | 8102 | Grande, model CDN3S-P2, type FFP2          | 1        | 2        | 5   |
| 224 | 8103 | 3M, model 1860, type N95                   | 3        | 200      | 103 |
| 225 | 8117 | Xiantao Zhong Yi, model ZYB - 11, type N95 | Not done | Not done | 11  |
| 226 | 8121 | Xiantao Zhong Yi, model ZYB - 11, type N95 | 4        | 14       | 5   |
| 227 | 8122 | Makrite, model 9500, type N95              | 16       | 14       | 41  |
| 228 | 8123 | Makrite, model 9500, type N95              | Not done | Not done | 3   |
| 229 | 8128 | Xiantao Zhong Yi, model ZYB - 11, type N95 | 3        | 10       | 4   |
| 230 | 8129 | Xiantao Zhong Yi, model ZYB - 11, type N95 | 10       | 15       | 16  |
| 231 | 8201 | 3M, model 9920H, type PFF                  | 9        | 18       | 5   |
| 232 | 8205 | 3M, model 1860, type N95                   | 170      | 200      | 200 |
| 233 | 8209 | Makrite, model 9500, type N95              | 9        | 20       | 18  |
| 234 | 8216 | 3M, model 1860, type N95                   | 3        | 120      | 111 |
| 235 | 8218 | Xiantao Zhong Yi, model ZYB - 11, type N95 | Not done | Not done | 4   |
| 236 | 8223 | Xiantao Zhong Yi, model ZYB - 11, type N95 | Not done | Not done | 13  |
| 237 | 8224 | 3M, model 1860, type N95                   | Not done | Not done | 197 |
| 238 | 8230 | Xiantao Zhong Yi, model ZYB - 11, type N95 | Not done | Not done | 14  |
| 239 | 8233 | 3M, model 1860, type N95                   | Not done | Not done | 120 |
| 240 | 9102 | Makrite, model 9500, type N95              | 1        | 1        | 1   |
| 241 | 9117 | 3M, model 1860, type N95                   | Not done | Not done | 200 |
| 242 | 9122 | Xiantao Zhong Yi, model ZYB - 11, type N95 | 2        | 20       | 4   |
| 243 | 9123 | Xiantao Zhong Yi, model ZYB - 11, type N95 | Not done | Not done | 2   |
| 244 | 9129 | Makrite, model 9500, type N95              | 2        | 12       | 5   |
| 245 | 9201 | 3M, model 9920H, type PFF                  | 4        | 75       | 45  |
| 246 | 9205 | 3M, model 1860, type N95                   | 110      | 200      | 73  |
| 247 | 9209 | 3M, model 9010, type N95                   | 4        | 110      | 36  |
| 248 | 9224 | 3M, model 1860, type N95                   | Not done | Not done | 155 |
| 249 | 9230 | Xiantao Zhong Yi, model ZYB - 11, type N95 | Not done | Not done | 7   |

|     |       |                                               |          |          |     |
|-----|-------|-----------------------------------------------|----------|----------|-----|
| 250 | 9233  | 3M, model 1860, type N95                      | Not done | Not done | 200 |
| 251 | 10102 | Makrite, model 9500, type N95                 | 2        | 8        | 5   |
| 252 | 10117 | Xiantao Zhong Yi, model ZYB - 11,<br>type N95 | Not done | Not done | 50  |
| 253 | 10122 | Xiantao Zhong Yi, model ZYB - 11,<br>type N95 | 6        | 60       | 22  |
| 254 | 10129 | Grande, model CDN3S-P2, type FFP2             | 5        | 11       | 10  |
| 255 | 10201 | 3M, model 9920H, type PFF                     | 50       | 200      | 77  |
| 256 | 10205 | 3M, model 1860, type N95                      | 3        | 200      | 143 |
| 257 | 10209 | Xiantao Zhong Yi, model ZYB - 11,<br>type N95 | 8        | 15       | 9   |
| 258 | 11102 | GIKO, model 1200H, type N95                   | 8        | 25       | 32  |
| 259 | 11201 | 3M, model 9920H, type PFF                     | 14       | 200      | 198 |
| 260 | 11205 | 3M, model 1860, type N95                      | 3        | 200      | 168 |
| 261 | 11209 | Makrite, model 9500, type N95                 | 3        | 70       | 27  |
| 262 | 12102 | Grande, model CDN3S-P2, type FFP2             | 1        | 1        | 2   |
| 263 | 12205 | 3M, model 1860, type N95                      | 5        | 200      | 200 |
