# Supplementary material for: Quantitative Fit Testing on Filtering Facepiece Respirators in Use by Peruvian Healthcare Workers Caring for Tuberculosis Patients During the COVID-19 Pandemic: PROFIT Study 2020
Source: Preprints.org preprint supplement (doi:10.20944/preprints202306.1055.v1), 2023-06-14
Supplement: Supplementary file 4 [file supplementary]

Archive with 3 entries (3 files):
- ijerph-2470945-Table S1.pdf
- ijerph-2470945-Table S2.pdf
- ijerph-2470945-Table S3.pdf
